# Supplementary material
Source: HighWire-hosted journal article supplement (https://bmjopen.bmj.com/content/11/8/e048890)
Supplement: inline-supplementary-material-1 [file inline-supplementary-material-1.pdf]

## A: Satisfaction questionnaire

### Planning and organization

| Question                                                                                      | Answer options                                       |
|-----------------------------------------------------------------------------------------------|------------------------------------------------------|
| Was the total number of days per week adequate for you?                                       | Just right<br>Too few/too short<br>Too many/too long |
| Was the total number of physical training sessions adequate for you?                          | Just right<br>Too few/too short<br>Too many/too long |
| Was the total number of physical education meetings adequate for you?                         | Just right<br>Too few/too short<br>Too many/too long |
| Was the total number of sessions for energy conservation management adequate for you?         | Just right<br>Too few/too short<br>Too many/too long |
| Was the total number of sessions for implementation and relapse prevention adequate for you?  | Just right<br>Too few/too short<br>Too many/too long |
| What did you think of the length of the period (16 weeks) in which the treatments took place? | Just right<br>Too few/too short<br>Too many/too long |
| How do you rate the location and facilities?                                                  | Rate 1= extremely bad; 10= extremely good            |

### Module Energy conservation management

| Question                                                                                                | Answer options                                       |
|---------------------------------------------------------------------------------------------------------|------------------------------------------------------|
| How do you rate session 1: Importance of rest?                                                          | Rate 1= extremely useless; 10= extremely useful      |
| How do you rate session 2: Communication, postures and positioning?                                     | Rate 1= extremely useless; 10= extremely useful      |
| How do you rate session 3: Practical situations?                                                        | Rate 1= extremely useless; 10= extremely useful      |
| How do you rate session 4: Priorities/standards/norms and values and analysis/adaptation of activities? | Rate 1= extremely useless; 10= extremely useful      |
| How do you rate session 5: Balance in your schedule?                                                    | Rate 1= extremely useless; 10= extremely useful      |
| How do you rate session 6: Evaluation and future plans?                                                 | Rate 1= extremely useless; 10= extremely useful      |
| How do you rate the length of session's energy conservation management?                                 | Just right<br>Too few/too short<br>Too many/too long |
| How do you rate the way the sessions were supervised by the occupational therapist?                     | Rate 1= extremely useless; 10= extremely useful      |

### Module Aerobic exercise training

| Question                                                                                 | Answer options                                       |
|------------------------------------------------------------------------------------------|------------------------------------------------------|
| How do you rate the added value/use of the physical training?                            | Rate 1= extremely useless; 10= extremely useful      |
| How do you rate the way in which the sessions were supervised by the physical therapist? | Rate 1= extremely useless; 10= extremely useful      |
| What did you think of the length of the physical training sessions?                      | Just right<br>Too few/too short<br>Too many/too long |

### Module physical education

| Question                                                    | Answer options                                  |
|-------------------------------------------------------------|-------------------------------------------------|
| How do you rate session 1: Introduction and training theory | Rate 1= extremely useless; 10= extremely useful |
| How do you rate session 2: Effects of training              | Rate 1= extremely useless; 10= extremely useful |

|                                                                                            |                                                      |
|--------------------------------------------------------------------------------------------|------------------------------------------------------|
| How do you rate session 3: Completion of the training & preparation of a training schedule | Rate 1= extremely useless; 10= extremely useful      |
| What did you think of the length of the physical education sessions?                       | Just right<br>Too few/too short<br>Too many/too long |
| How do you rate the way in which the sessions were supervised by the physical therapist?   | Rate 1= extremely useless; 10= extremely useful      |

### Module implementation and relapse prevention

| Question                                                                                             | Answer options                                       |
|------------------------------------------------------------------------------------------------------|------------------------------------------------------|
| What did you think of the extent to which your next of kin or partner was involved in the programme? | Just right<br>Too few/too short<br>Too many/too long |
| How do you rate the various sports sessions?                                                         | Rate 1= extremely useless; 10= extremely useful      |
| How do you rate the dietetics/nutrition session?                                                     | Rate 1= extremely useless; 10= extremely useful      |
| How do you rate employment session?                                                                  | Rate 1= extremely useless; 10= extremely useful      |

### Therapists

| Question                                                                                      | Answer options                                            |
|-----------------------------------------------------------------------------------------------|-----------------------------------------------------------|
| Did you find the occupational therapist competent?                                            | No, not at all<br>A little<br>Largely so<br>Yes, entirely |
| Did the occupational therapist give advice that is appropriate and useful for your situation? | No, not at all<br>A little<br>Largely so<br>Yes, entirely |
| Did you find the physical therapist competent?                                                | No, not at all<br>A little<br>Largely so<br>Yes, entirely |
| Did the physical therapist give advice that is suitable and useful for your situation?        | No, not at all<br>A little<br>Largely so<br>Yes, entirely |

### Treatment

| Question                                                            | Answer options                                            |
|---------------------------------------------------------------------|-----------------------------------------------------------|
| Did the occupational therapist treat you politely and with respect? | No, not at all<br>A little<br>Largely so<br>Yes, entirely |
| Did the occupational therapist make you feel at ease?               | No, not at all<br>A little<br>Largely so<br>Yes, entirely |
| Did the physical therapist treat you politely and with respect?     | No, not at all<br>A little<br>Largely so<br>Yes, entirely |
| Did the physical therapist ensure that you felt at ease?            | No, not at all<br>A little<br>Largely so<br>Yes, entirely |

### Results

| Question                                                                                            | Answer options                                            |
|-----------------------------------------------------------------------------------------------------|-----------------------------------------------------------|
| Are you satisfied with the results of the Energetic programme?                                      | No, not at all<br>A little<br>Largely so<br>Yes, entirely |
| Can the Energetic programme help you deal with your limitations and/or problems better than before? | No, not at all<br>A little<br>Largely so<br>Yes, entirely |

**Overall satisfaction**

| Question                                                                                                                                       | Answer options                                                         |
|------------------------------------------------------------------------------------------------------------------------------------------------|------------------------------------------------------------------------|
| Suppose you have a good friend who is in the same situation as you. Would you recommend this friend to participate in the Energetic programme? | Yes, absolutely<br>Yes, maybe<br>No<br>I don't know if I would do that |
| How do you rate your satisfaction with the Energetic programme?                                                                                | Rate 1= extremely bad; 10= extremely good                              |

**Open questions:**

- The most valuable for me was:
- If I could change the programme, I would change....
- Space for comments on the Energetic programme
